# Supplementary figures and images for: Cholesterol lowering by Pediococcus acidilactici LAB4 and Lactobacillus plantarum LAB12 in adult zebrafish is associated with improved memory and involves an interplay between npc1l1 and abca1
Source: Royal Society of Chemistry journal article supplement (doi:10.1039/c7fo00764g), 2017-01-01

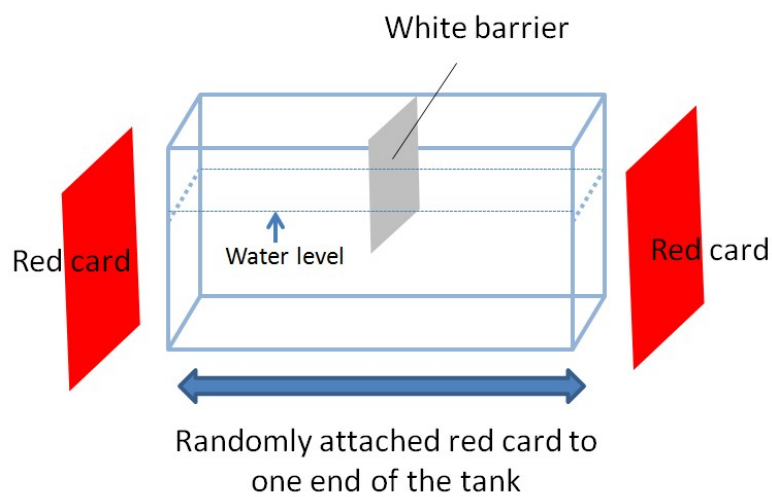

1

2 **Supplementary 1:** Layout of Zebrafish Behavioural Test setup.

3

4

5

Supplement: c7fo00764g1.pdf [file c7fo00764g1.pdf]
